# Supplementary material for: Dietary squid ink polysaccharide could enhance SIgA secretion in chemotherapeutic mice
Source: Royal Society of Chemistry journal article supplement (doi:10.1039/c4fo00569d), 2014-09-23
Supplement: c4fo00569d1.pdf [file c4fo00569d1.pdf]

Supplementary Table 1 Primers used in this study<sup>a</sup>

| gene           | forward primer            | reverse primer            | Genbank No.    |
|----------------|---------------------------|---------------------------|----------------|
| <b>β-actin</b> | CAGGCATTGCTGACAGGATG      | TGCTGATCCACATCTGCTGG      | NM_007392.3    |
| <b>pIgR</b>    | CAGACATTAGCATGGCAGACTTCA  | TGCCGAGTAGGCCATGTCAG      | NM_011082.3    |
|                | A                         |                           |                |
| <b>J Chain</b> | TTTGTTAAGGCTGTCCTTGT      | AAGTGGAGCTGGAAGATCAG      | NM_152839.3    |
| <b>α-chain</b> | TGAGCGCTGGAACAGTGGCG      | TCAGGGCCAGCTCCTCCGAC      | XM_006538496.1 |
| <b>TNF-α</b>   | CTGTAGCCCACGTCGTAGC       | TTGAGATCCATGCCGTTG        | NM_013693.3    |
| <b>IL-10</b>   | ACTGCACCCACGTCGTAGC       | TGTCCAGCTGGTCCTTTGTT      | NM_010548.2    |
| <b>IL-6</b>    | GCTACCAAACCTGGATATAATCAGG | CCAGGTAGCTATGGTACTCCAGAA  | NM_031168.1    |
|                | A                         |                           |                |
| <b>Bip</b>     | TTCAGCCAATTATCAGCAAACCTCT | TTTTCTGATGTATCCTCTTCACCAG | NM_001163434.1 |
|                |                           | T                         |                |
| <b>XBP-1s</b>  | CAGCACTCAGACTATGTGCA      | GTCCATGGGAAGATGTTCTGG     | NM_013842.3    |
| <b>ATF-4</b>   | GATGGAGCAAAACAAGACAGCA    | AGCACAAAGCACCTGACTACCC    | NM_001287180.1 |
| <b>ATF-6</b>   | AGTGTCCCAGCAAAAGCCATC     | TCTGAAGTTGAACCACAGTCGG    | XM_006496792.1 |

<sup>a</sup>gene-specific primers were designed by *Primer Premier 5.0* software
